# Supplementary material
Source: PubMed Central journal article supplement (PMC5323295)

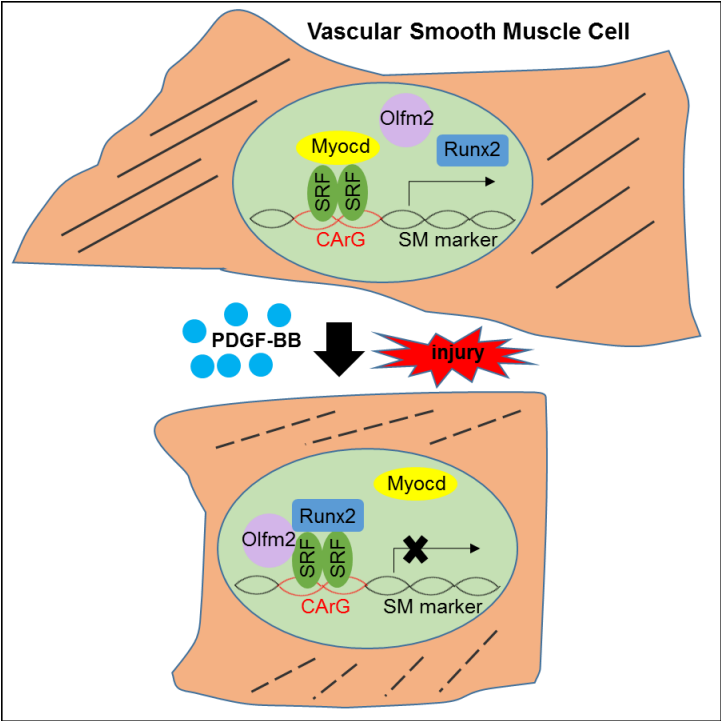

Supplement: NIHMS838896-supplement-Graphic_Abstract.pdf [file NIHMS838896-supplement-Graphic_Abstract.pdf]
